# Supplementary material for: Comparison of Size Distribution of Fish Obtained from Gill Netting and the Distributions of Echoes from Hydroacoustics in Lake Dejguny (Poland)
Source: MDPI journal article supplement (doi:10.3390/w15061117), 2023-03-14
Supplement: s1 [file s1]

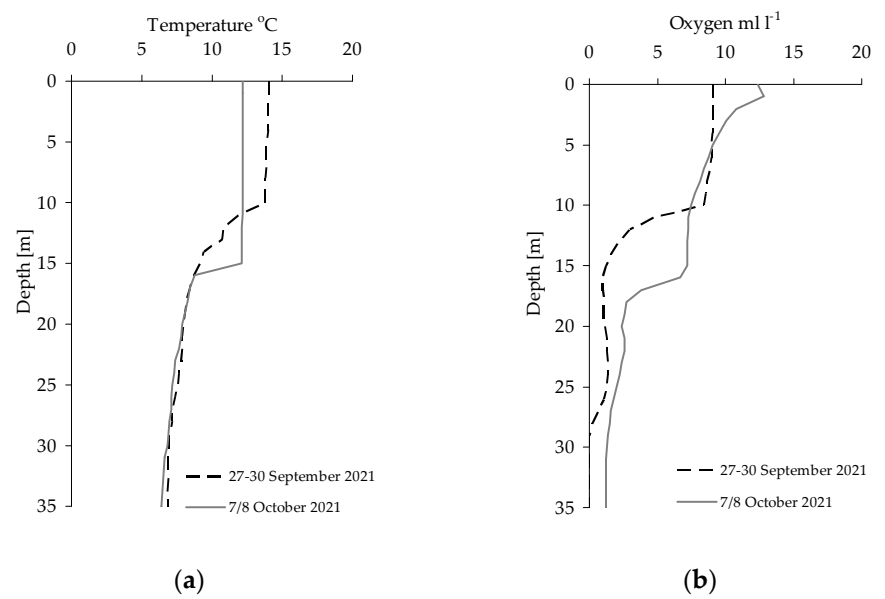

**Figure S1.** Vertical profiles of dissolved oxygen and temperature measured during each sampling period. Dashed black lines indicate 27-30 September 2021, and solid dark grey lines indicate 7/8 October 2021.

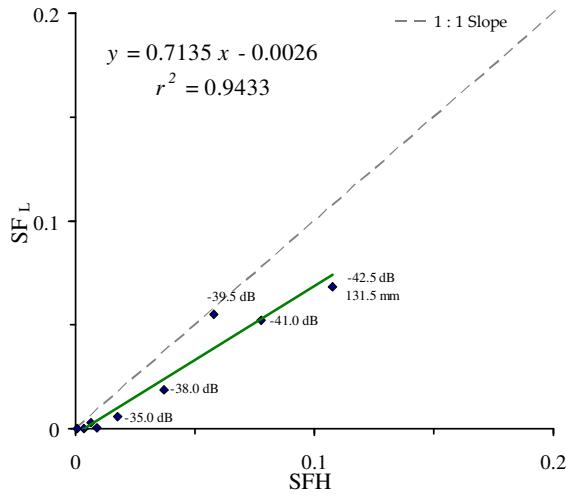

(a)

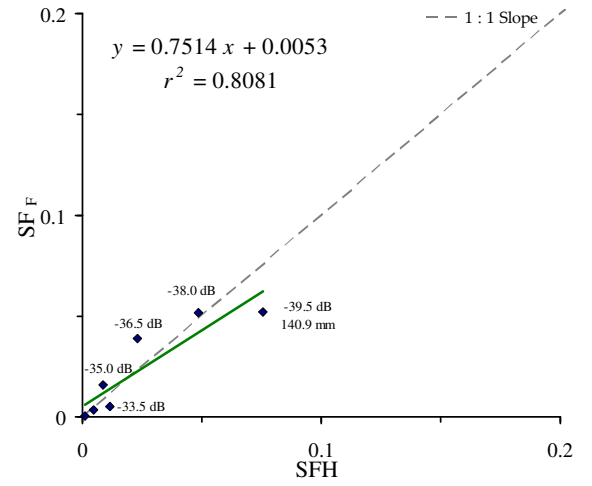

(b)

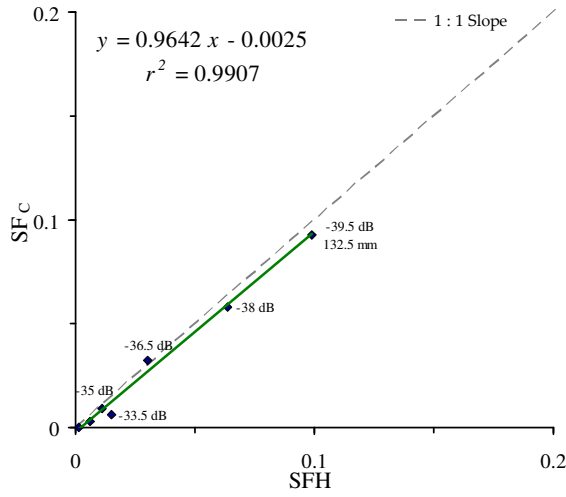

(c)

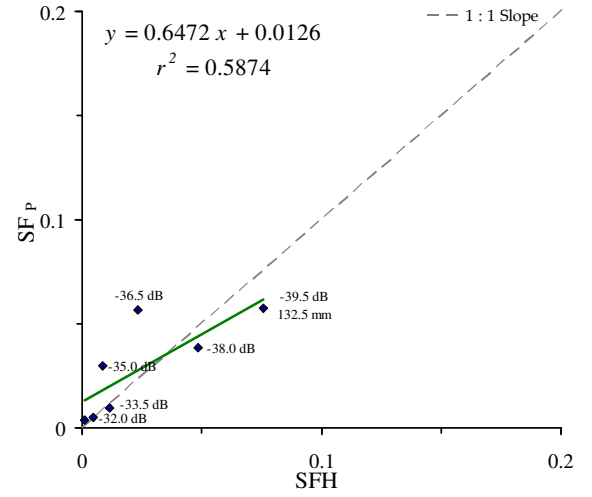

(d)

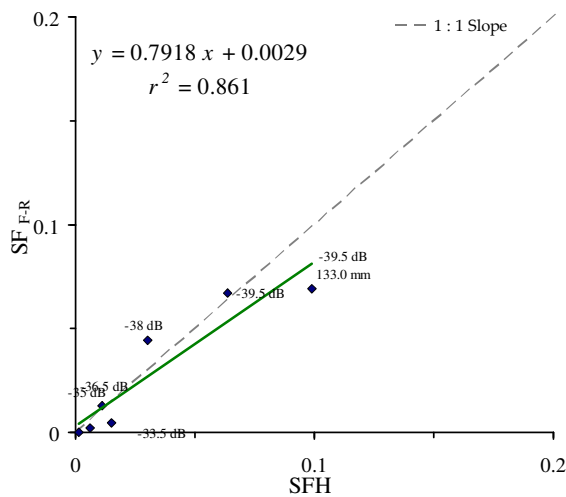

(e)

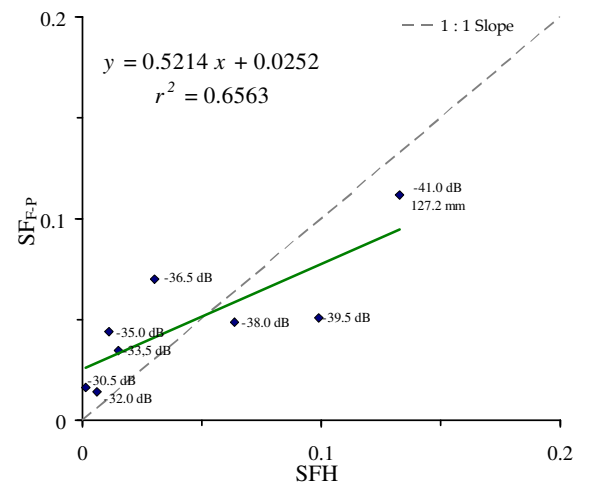

(f)

**Figure S2.** Regression between the share of the number (SF) of medium and long fish (for TS values  $> -42.5$  dB) (marked with a green line) caught using Nordic multimesh gillnets in total length (TL) classes whose boundaries are determined (a) using the equation from Love (1971) [7] and (b) according to the multi-species regression from Frouzová et al. (2005) [2] (c) equations for representa-

---

tives of the Cyprinidae family and (d) the Percidae family from Borisenko et al. (2006) [21], (e) for perch (*Perca fluviatilis*) and (f) roach (*Rutilus rutilus*) from Frouzová et al. (2005) [2]. Explanations: SFH—relative share of hydroacoustic identified fish.
